# Supplementary material for: Structure-dependent water transport across nanopores of carbon nanotubes: toward selective gating upon temperature regulation
Source: Royal Society of Chemistry journal article supplement (doi:10.1039/c4cp06054g), 2015-01-01
Supplement: c4cp06054g2.pdf [file c4cp06054g2.pdf]

Supporting Information for

# **Structure-dependent water transport across nanopores of carbon nanotubes: toward selective gating upon temperature regulation**

Kuiwen Zhao and Huiying Wu\*

School of Mechanical Engineering, Shanghai Jiao Tong University, Shanghai, 200240, China.

Corresponding Author: [whysrj@sjtu.edu.cn](mailto:whysrj@sjtu.edu.cn)

## **1. Methods**

Molecular dynamics simulations were performed using the LAMMPS<sup>1</sup>. Water was modeled using the TIP4P/2005 rigid water model, one of the best models for describing condensed phases of water, both solid and liquid<sup>2</sup>. The TIP4P/2005 rigid water model gives an excellent prediction of the thermodynamic properties, including self-diffusion coefficient, density, and phase diagram, over the temperature range from 123 K to 573 K<sup>2</sup>, which are very important for this work. The freezing point of TIP4P/2005 water model at 1 atm is 252.1 K, about 21 K below the experimental value. The Lennard-Jones parameters of carbon atoms are  $\sigma_{cc}=3.55$  Å and  $\varepsilon_{cc}=0.07$  kcal/mol, corresponding to the aromatic carbon in the CHARMM27 force field<sup>3</sup>. The van der Waals parameters of different species of atoms were obtained by the Lorentz–Berthelot

combining rules. A 12-Å cutoff distance for the pair interactions was used. The particle-particle particle-mesh (PPPM) algorithm was used to calculate the long-range electrostatic interaction. Harmonic restraining force ( $1.0 \text{ kcal/mol/\text{Å}^2}$ ) was applied to the carbon atoms of the nanotubes to prevent their displacements in the simulations. Periodic boundary conditions were imposed in all directions. The equations of motion were integrated in time using the leapfrog scheme with a time step of 2 fs. Structures were saved every 1 ps. Simulation systems were maintained constant at 1 atm using Nosé–Hoover barostat.

## 2. Comparison with continuum predictions

To compare our results with continuum predictions, we conducted two additional simulations of pressure-driven water flow across nanopores with  $d = 0.798 \text{ nm}$  at 303.15 and 373.15 K following the reference <sup>4</sup>. To avoid the damage of water structures in nanopores induced by a high pressure difference, a small pressure difference of 5 MPa (still very large for practical applications) is imposed across the nanoporous membrane. We obtain a net water flux of  $6.54 \text{ ns}^{-1}$  at 373.15 K (Figure S1a). However, no obvious net water flux is observed as the temperature decreases to 303.15 K (Figure S1b).

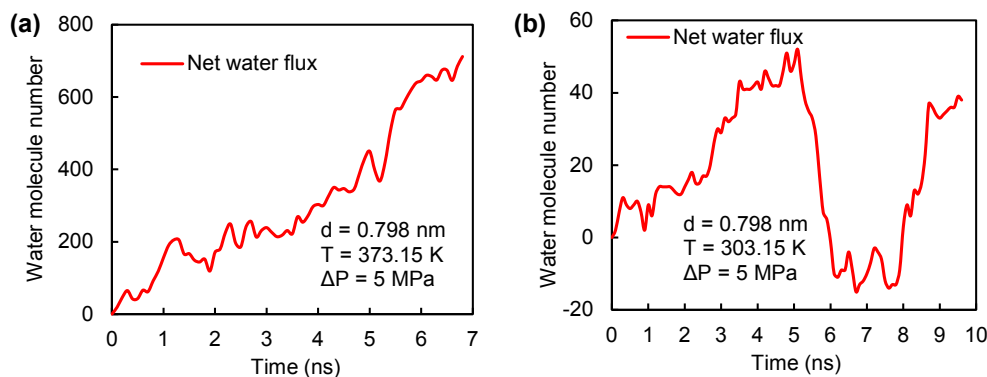

**Figure S1.** Net water flow across nanoporous membrane of carbon nanotubes under a pressure difference of 5 MPa at 373.15 K (a) and 303.15 K (b). The membrane consists of 16 nanopores

with  $d = 0.798$  nm.

According to no-slip Hagen–Poiseuille equation in continuum hydrodynamics theory, the water flux across a cylindrical shaped channel under a pressure difference can be determined from <sup>4-6</sup>

$$Q = \frac{\pi d^4}{128\mu} \frac{\Delta P}{L} \quad (1)$$

where  $d$  is the inner diameter of channel,  $\Delta P$  is the pressure difference,  $\mu$  is the dynamic viscosity of water, and  $L$  is the length of channel. A water flux of  $3.9 \times 10^{-20}$  m<sup>3</sup>/s, corresponding to  $1.3$  ns<sup>-1</sup>, can be predicted by Equation 1 for  $d = 0.798$  nm and  $L = 1.6$  nm at  $303.15$  K. The net water flux for Figure S1b is definitely smaller than it. For  $T = 373.15$  K, the net water flux obtained from MD simulations (Figure S1a) is 1.8 times of the prediction of no-slip Hagen–Poiseuille equation, which is consistent with previous literature <sup>6</sup>.

## References

1. S. Plimpton, *J. Comput. Phys.*, 1995, **117**, 1-19.
2. J. L. F. Abascal and C. Vega, *J. Chem. Phys.*, 2005, **123**, 234505.
3. A. D. MacKerell, D. Bashford, M. Bellott, R. L. Dunbrack, J. D. Evanseck, M. J. Field, S. Fischer, J. Gao, H. Guo, S. Ha, D. Joseph-McCarthy, L. Kuchnir, K. Kuczera, F. T. K. Lau, C. Mattos, S. Michnick, T. Ngo, D. T. Nguyen, B. Prodhom, W. E. Reiher, B. Roux, M. Schlenkrich, J. C. Smith, R. Stote, J. Straub, M. Watanabe, J. Wiorcikiewicz-Kuczera, D. Yin and M. Karplus, *Journal of Physical Chemistry B*, 1998, **102**, 3586-3616.
4. J. Goldsmith and C. C. Martens, *Phys. Chem. Chem. Phys.*, 2009, **11**, 528-533.
5. S. P. Sutera and R. Skalak, *Annu. Rev. Fluid Mech.*, 1993, **25**, 1-20.

6. J. H. Walther, K. Ritos, E. R. Cruz-Chu, C. M. Megaridis and P. Koumoutsakos, *Nano Lett.*, 2013, **13**, 1910-1914.
